# Supplementary material for: SH3BGRL Suppresses Liver Tumor Progression through Enhanced ATG5-Dependent Autophagy
Source: Hindawi journal article supplement (doi:10.1155/2023/1105042), 2023-04-24

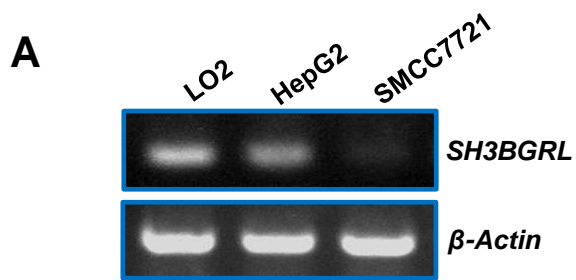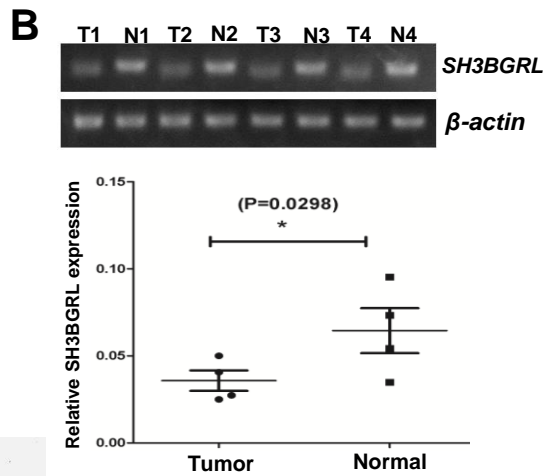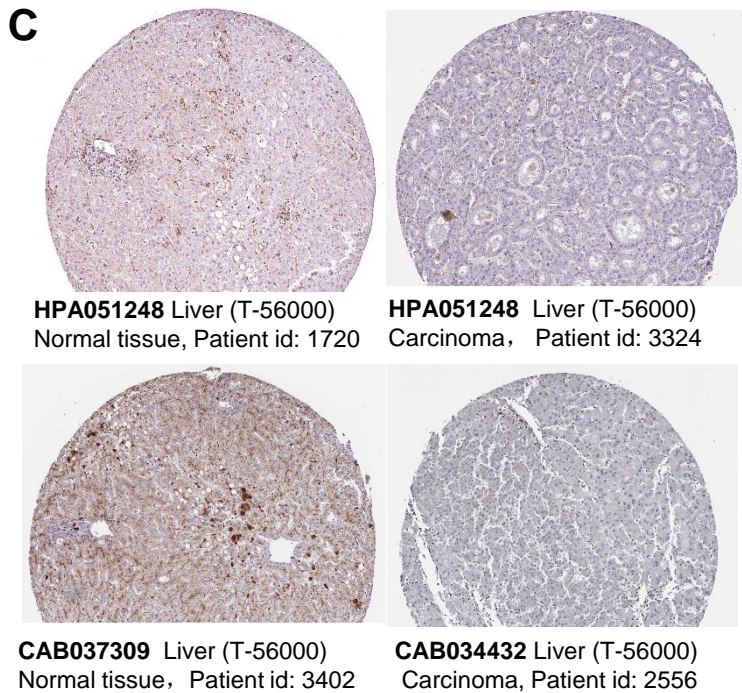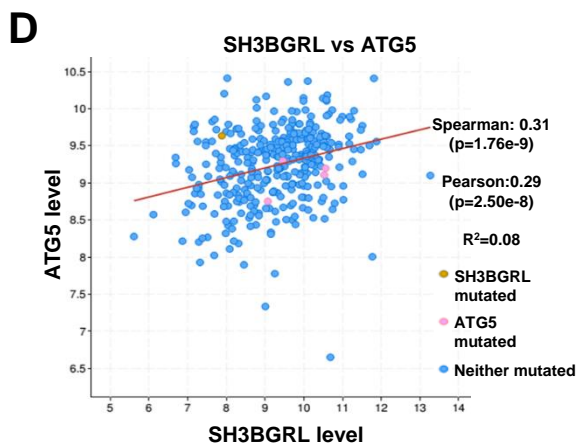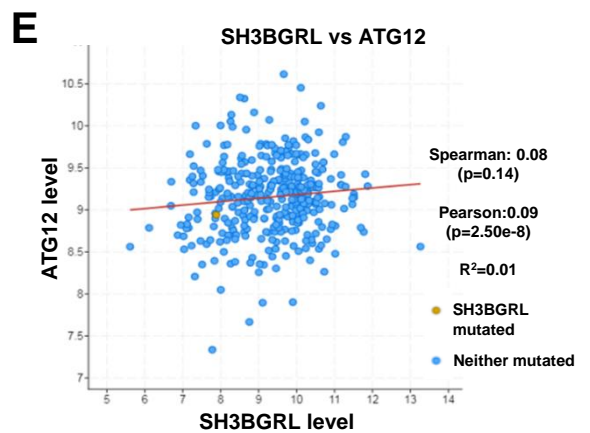

Supplement: f1 [file 1105042.f1.pdf]
